# Supplementary material for: A linker conformation induced metal–organic framework with high stability and efficient upgrading of natural gas
Source: Royal Society of Chemistry journal article supplement (doi:10.1039/d3dt00979c), 2023-01-01
Supplement: d3dt00979c1.pdf [file d3dt00979c1.pdf]

## Supporting Information

### **Linker Conformation Induced Metal-Organic Framework with high Stability and Efficient Upgrading of Natural Gas**

*Shi-Ming Li, Hong-Chan Jiang, Qing-Ling Ni, Liu-Cheng Gui, \* Xiu-Jian Wang\**

<sup>a</sup> School of Chemistry and Pharmaceutical Sciences, Guangxi Normal University, Guilin  
541004, China.

## Table of contents

### S1. Supplementary methods

1. Fitting of unary isotherm data
2. Isothermic heat of adsorption calculations
3. IAST calculations of selectivity
4. Breakthrough simulations
5. Grand canonical Monte Carlo simulations
6. Synthesis of ligand H<sub>6</sub>bmipia

### S2. Supplementary tables

**Table S1.** Crystal data and structure refinement parameters for **GNU-1**

**Table S2.** Comparison of C<sub>3</sub>H<sub>8</sub>/CH<sub>4</sub>, C<sub>2</sub>H<sub>6</sub>/CH<sub>4</sub> selectivities for **GNU-1a** and other MOFs

### S3. Supplementary figures

**Figure S1.** Comparison of FTIR spectra of as-synthesized **GNU-1** and ligands

**Figure S2.** The 3D framework of **GNU-1**

**Figure S3.** TGA curve for **GNU-1** under N<sub>2</sub> atmosphere

**Figure S4.** Comparison of PXRD patterns of **GNU-1**

**Figure S5.** Virial fitting of C<sub>3</sub>H<sub>8</sub> adsorption data for **GNU-1** at 273 and 298 K.

**Figure S6.** Virial fitting of C<sub>2</sub>H<sub>6</sub> adsorption data for **GNU-1** at 273 and 298 K.

**Figure S7.** Virial fitting of CH<sub>4</sub> adsorption data for **GNU-1** at 273 and 298 K.

**Figure S8.** Dual-site Langmuir-Freundlich model for C<sub>3</sub>H<sub>8</sub> adsorption isotherm on **GNU-1** at 298 K.

**Figure S9.** Dual-site Langmuir-Freundlich model for C<sub>3</sub>H<sub>8</sub> adsorption isotherm on **GNU-1** at 273 K.

**Figure S10.** Dual-site Langmuir-Freundlich model for C<sub>2</sub>H<sub>6</sub> adsorption isotherm on **GNU-1** at 298 K.

**Figure S11.** Dual-site Langmuir-Freundlich model for C<sub>2</sub>H<sub>6</sub> adsorption isotherm on **GNU-1** at 273 K.

**Figure S12.** Single-site Langmuir-Freundlich model for CH<sub>4</sub> adsorption isotherm on

**GNU-1** at 298 K.

**Figure S13.** Single-site Langmuir-Freundlich model for CH<sub>4</sub> adsorption isotherm on

**GNU-1** at 273 K.

## **References**

## S1. Supplementary methods

### 1. Fitting of unary isotherm data

The unary isotherms for CH<sub>4</sub>, C<sub>2</sub>H<sub>6</sub>, and C<sub>3</sub>H<sub>8</sub> measured at two different temperatures 273 K, and 298 K in **GNU-1a** were fitted with excellent accuracy using the dual-site Langmuir-Freundlich model, where we distinguish two distinct adsorption sites A and B:

$$q = \frac{q_{sat,A} b_A p^{v_A}}{1 + b_A p^{v_A}} + \frac{q_{sat,B} b_B p^{v_B}}{1 + b_B p^{v_B}} \quad (S1)$$

In eq. (S1), the Langmuir-Freundlich parameters  $b_A$  and  $b_B$  are both temperature dependent:

$$b_A = b_{A0} \exp\left(\frac{E_A}{RT}\right); b_B = b_{B0} \exp\left(\frac{E_B}{RT}\right) \quad (S2)$$

In eq (S2),  $E_A$  and  $E_B$  are the energy parameters associated with sites A, and B, respectively.

The unary isotherm fit parameters for each of the guest molecules in **GNU-1a** are provided in Table S2.

### 2. Isothermic heat of adsorption calculations

The isothermic heat of adsorption ( $Q_{st}$ ) is defined as:

$$Q_{st} = -RT^2 \left( \frac{\partial \ln q}{\partial T} \right) \quad (S3)$$

Where the derivative in the right member of eq (S3) is determined at constant adsorbate loading,  $q$ ; the derivative can be determined analytically using equations (S1), (S2), and (S3).

### 3. IAST calculations of selectivity

The adsorption selectivity for separation for components 1 and 2 is defined by:

$$S_{ads} = \frac{q_1/q_2}{p_1/p_2} \quad (S4)$$

IAST calculations were carried out for equimolar C<sub>3</sub>H<sub>6</sub>/C<sub>3</sub>H<sub>8</sub>/C<sub>2</sub>H<sub>2</sub>/C<sub>2</sub>H<sub>4</sub>/C<sub>2</sub>H<sub>6</sub>/CH<sub>4</sub> mixtures at 298 K.

#### 4. Grand canonical monte carlo simulations

All simulations were performed by the Materials Studio (MS) 2020 package. The preferred sorption locations were performed by GCMC simulations with Adsorption fixed pressure task and Metropolis method in the sorption calculation module at 298 K and 1 bar. As for all of the GCMC simulations, the framework was considered to be rigid. The framework and gas molecule were described by the force field of COMPASSIII. The cutoff radius was set to 12.5 Å, for the Lennard-Jones (LJ) interactions, and the electrostatic interactions, and the Ewald summation method was selected to calculate the electrostatic interactions between adsorbates as well as between adsorbates and the framework. For state point in GCMC simulation, the system adopted  $1 \times 10^6$  Monte Carlo steps to guarantee equilibration, and the ultimate data was collected for another  $1 \times 10^7$  Monte Carlo steps. The embedded charges of the atoms of both gas molecules and the framework were assigned by the force field of COMPASSIII<sup>1</sup>.

#### 5. Synthesis of ligand H<sub>6</sub>bmipia

Dimethyl 5-amino-phthalate (209 mg, 1 mmol), dimethyl 5-bromomethyl phthalate (631.4 mg, 2.2 mmol) and sodium hydroxide (88 mg, 2.2 mmol) were added into a 250 mL round-bottom flask, and then 50 mL distilled water was added. The reaction was refluxing at 80 °C for 24 h before filtration. Then, the dry white filter cake was transferred to the round-bottom flask, followed, sodium hydroxide and 50 mL distilled water were added into the flask, the reaction was also refluxing at 80 °C for 24 h. Then reaction mixture was poured into the beaker and hydrochloric acid was added, to adjust the pH to 1-2. The yellow solid product was obtained after filtration and drying (800 mg, 81.0 %).

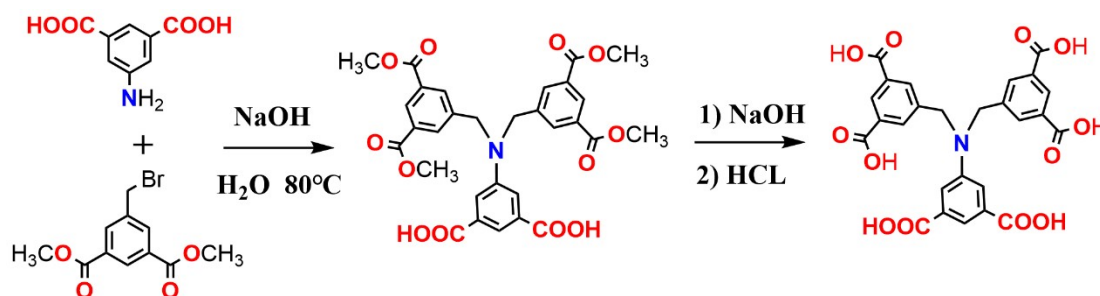

**Scheme S1.** Synthetic route to the organic linker

## S2. Supplementary tables

**Table S1.** Crystal data and structure refinement parameters for **GNU-1**

|                                                        |                                                                       |
|--------------------------------------------------------|-----------------------------------------------------------------------|
| Empirical formula                                      | C <sub>26</sub> H <sub>19</sub> Cu <sub>3</sub> N O <sub>15</sub>     |
| Formula weight (g mol <sup>-1</sup> )                  | 776.04                                                                |
| Crystal system                                         | orthorhombic                                                          |
| Space group                                            | Cmce                                                                  |
| a (Å)                                                  | 13.7215(3)                                                            |
| b (Å)                                                  | 35.1471(8)                                                            |
| c (Å)                                                  | 19.2775(5)                                                            |
| $\alpha$ /°                                            | 90                                                                    |
| $\beta$ (°)                                            | 90                                                                    |
| $\gamma$ /°                                            | 90                                                                    |
| V (Å <sup>3</sup> )                                    | 9297.0(4)                                                             |
| Z                                                      | 8                                                                     |
| $\rho_{\text{calc}}$ (g cm <sup>-3</sup> )             | 1.109                                                                 |
| $\mu$ (mm <sup>-1</sup> )                              | 2.022                                                                 |
| F (000)                                                | 3112.0                                                                |
| 2 $\Theta$ range for data collection/°                 | 5.028 to 127.99                                                       |
| Index ranges                                           | -15 $\leq$ h $\leq$ 6, -40 $\leq$ k $\leq$ 40, -22 $\leq$ l $\leq$ 22 |
| Reflections collected                                  | 14985                                                                 |
| Independent reflections                                | 4018 [R <sub>int</sub> = 0.0485, R <sub>sigma</sub> = 0.0303]         |
| Goodness-of-fit on F <sup>2</sup>                      | 1.110                                                                 |
| Final R indexes [I $\geq$ 2 $\sigma$ (I)] <sup>a</sup> | R <sub>1</sub> = 0.0788, wR <sub>2</sub> = 0.2738                     |
| Final R indexes [all data] <sup>b</sup>                | R <sub>1</sub> = 0.0872, wR <sub>2</sub> = 0.2857                     |
| Largest diff. peak/hole / e Å <sup>-3</sup>            | 0.85/-0.59                                                            |
| CCDC deposition number                                 | 2233603                                                               |

$$^a R_1 = \frac{\sum ||F_o| - |F_c||}{\sum |F_o|}, \quad ^b wR_2 = \left\{ \frac{\sum [w(F_o^2 - F_c^2)^2]}{\sum w(F_o^2)^2} \right\}^{1/2}$$

**Table S2** Comparison of C<sub>3</sub>H<sub>8</sub>/C<sub>2</sub>H<sub>6</sub>/CH<sub>4</sub> uptakes and C<sub>3</sub>H<sub>8</sub>/CH<sub>4</sub> (5/85) and C<sub>2</sub>H<sub>6</sub>/CH<sub>4</sub> (10/85)

selectivities of some reported materials (298 K, 1 bar)

| Materials                       | $C_3H_8/C_2H_6/CH_4$ | $C_3H_8/CH_4$ | $C_2H_6/CH_4$ | Reference |
|---------------------------------|----------------------|---------------|---------------|-----------|
|                                 | uptake ( mmol/g)     | selectivity   | selectivity   |           |
| Ni(tmbdc)(dabco) <sub>0.5</sub> | 5.54/5.81/1.50       | 274           | 29            | 2         |
| FIR-51                          | 4.54/4.21/0.644      | 326.8         | 15            | 3         |
| GNU-1                           | 6.64/4.60/1.12       | 330.13        | 17.54         | This work |
| Cu-MOF                          | 5.98/3.22/0.39       | 203.6         | 9.3           | 4         |
| Fe <sub>2</sub> (dobdc)         | 5.73/5.05/0.792      | -             | 32            | 5         |
| PAF-40-Fe                       | 2.61/1.87/0.644      | 56            | 16.2          | 6         |
| JUC-100                         | 6.14/4.14/0.479      | 65            | 8             | 7         |
| RT-MIL-100(Fe)                  | 6.85/2.23/3.96       | 33.3          | 6             | 8         |
| HKUST-1                         | 7.13/5.63/0.990      | 97            | 17            | 9         |
| 0.3Gly@HKUST-1                  | 7.87/6.55/1.04       | 173           | 12.6          | 9         |
| MIL-142A                        | 5.32/3.82/0.54       | 1300          | 13.7          | 10        |
| BSF-2                           | 2.23/1.46/0.40       | 2609          | 53            | 11        |
| PCN-224                         | 8.25/2.93/0.48       | 609           | 12            | 12        |
| MFM-202a                        | 6.76/4.21/0.45       | 87            | 10            | 13        |
| FJI-C1                          | 6.33/3.72/0.43       | 471           | 22            | 14        |
| UTSA-35a                        | 2.97/2.43/0.43       | 80            | 15            | 15        |
| Zr-FUM                          | 2.38/-/0.53          | 292           | -             | 16        |
| FIR-7a-ht                       | 7.24/4.06/0.46       | 78.8          | 14.6          | 17        |
| A-AC-4                          | 11.76/6.59/1.18      | 88.8          | 15.1          | 18        |
| JLU-Liu45                       | 3.79/3.78/0.69       | 42.7          | 20.1          | 19        |
| Zr-SDBA                         | 2.42/2.08/0.57       | 97.5          | 15.0          | 19        |
| Zr-OBBA                         | 0.78/0.5/0.16        | 105.6         | 16.7          | 19        |
| UPC-33                          | 4.18/1.56/0.31       | 41.8          | 6.64          | 20        |
| FJI-H21                         | 3.61/3.45/0.32       | 145.2         | 17.1          | 21        |
| UPC-100-In                      | 5.31/5.33/0.51       | 186.4         | 17.90         | 22        |
| LIFM-26                         | 5.21/4.61/0.49       | 46            | 11            | 23        |



### S3. Supplementary figures

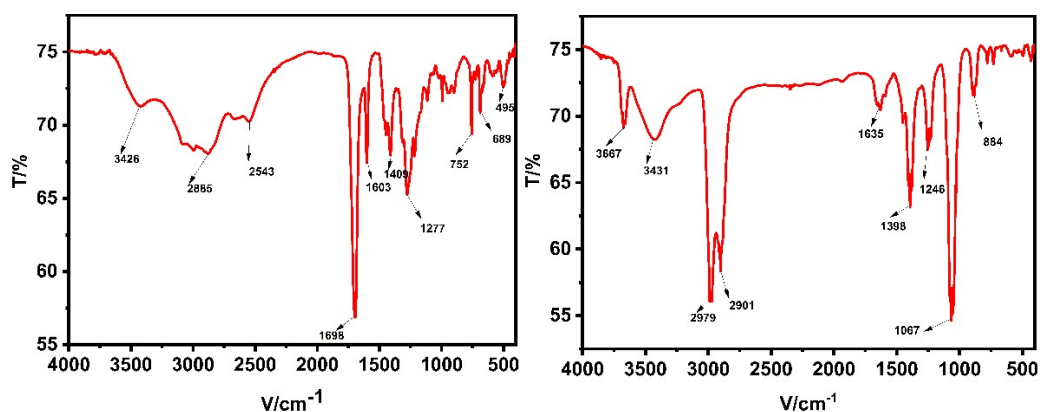

Figure S1. Comparison of FTIR spectra of ligands (left) and as-synthesized GNU-1 (right).

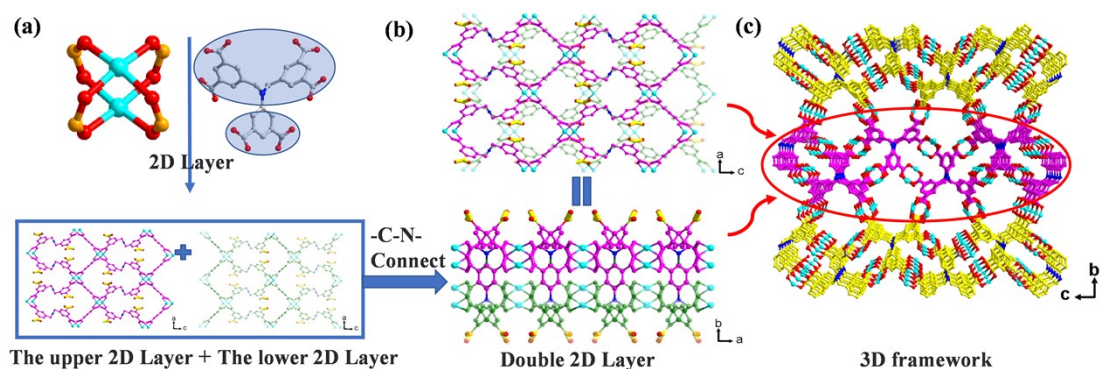

Figure S2. (a) Copper paddlewheel and ligand construct 2D Layer; (b) The Double 2D layer; (c) 3D framework.

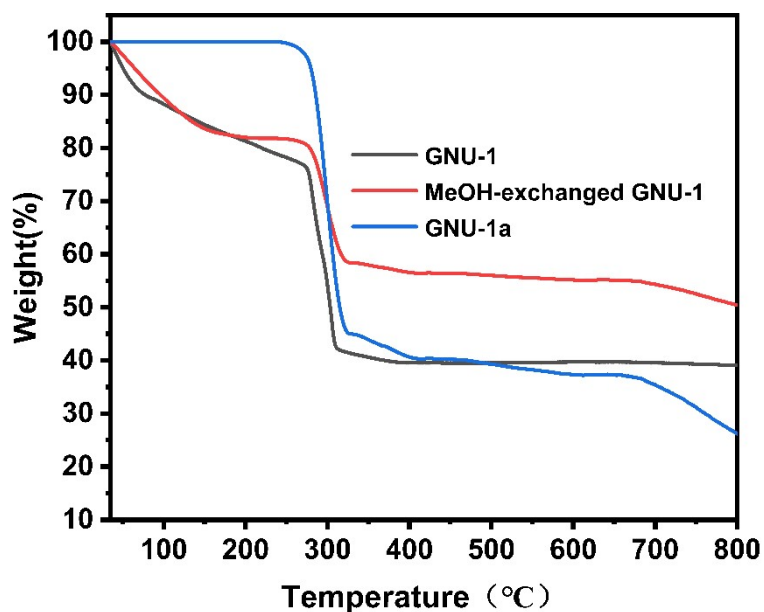

Figure S3. TGA curves of as-synthesized, MeOH-exchanged, and activated GNU-1 under  $\text{N}_2$  atmosphere.

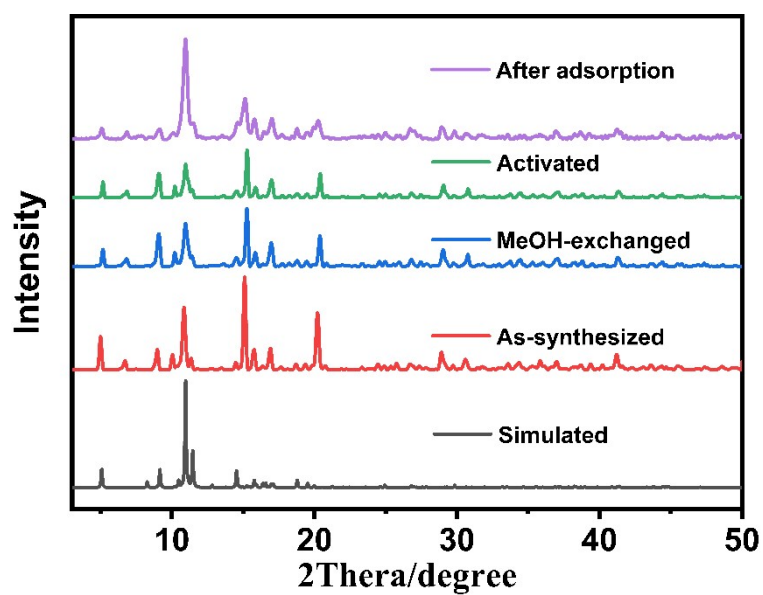

Figure S4. Comparison of PXRD patterns of GNU-1.

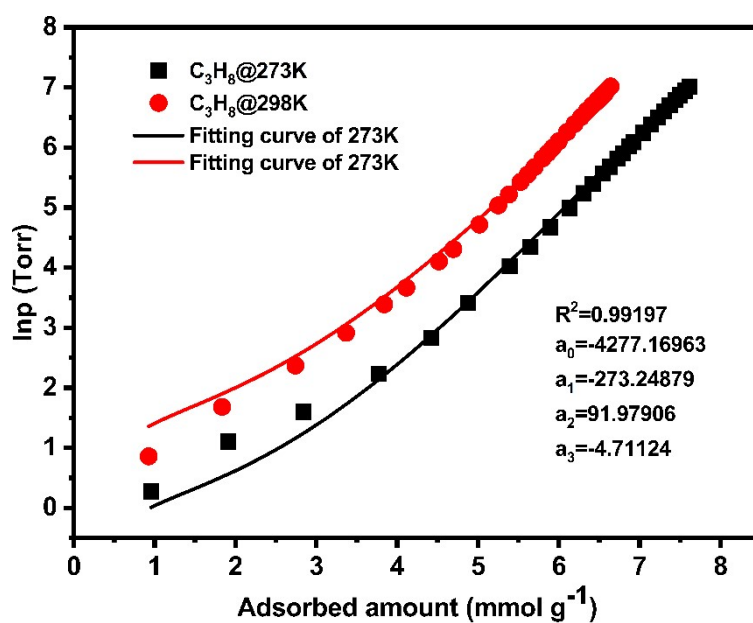

Figure S5 Virial fitting of  $C_3H_8$  adsorption data for GNU-1 at 273 and 298 K.

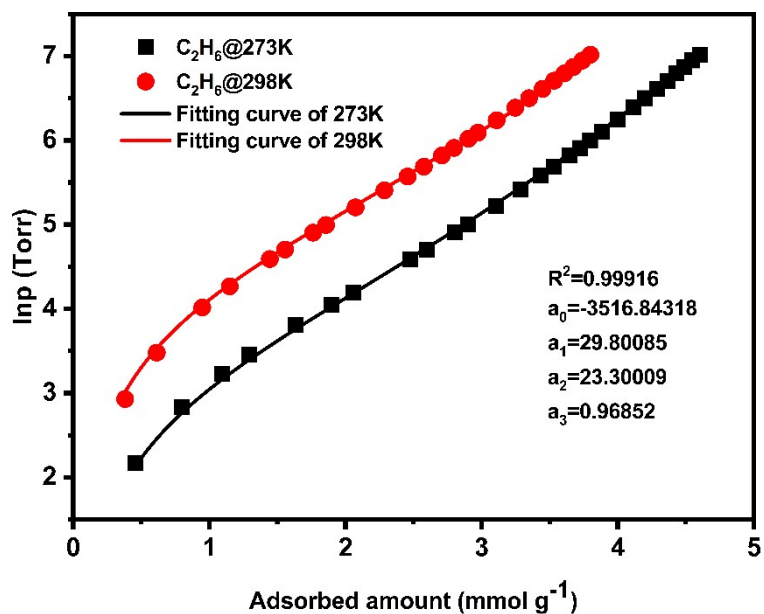

**Figure S6** Virial fitting of C<sub>2</sub>H<sub>6</sub> adsorption data for GNU-1 at 273 and 298 K.

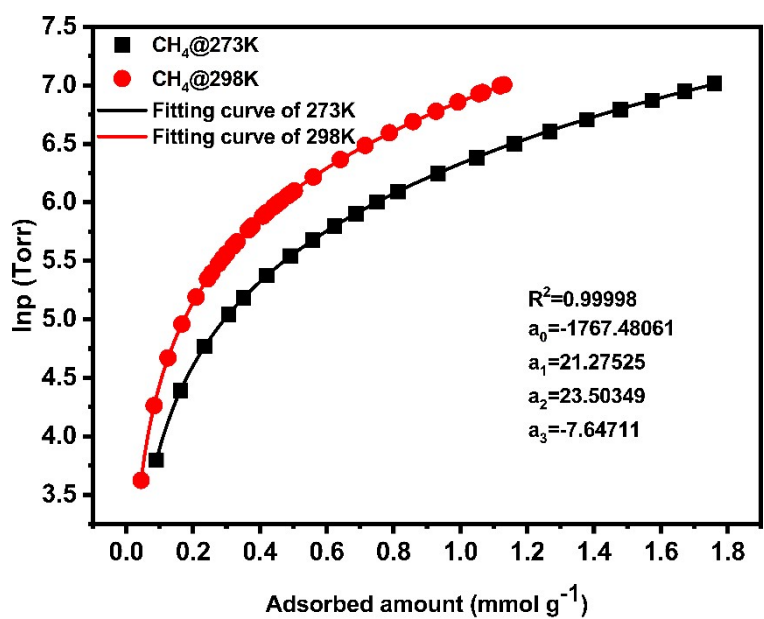

**Figure S7** Virial fitting of CH<sub>4</sub> adsorption data for GNU-1 at 273 and 298 K.

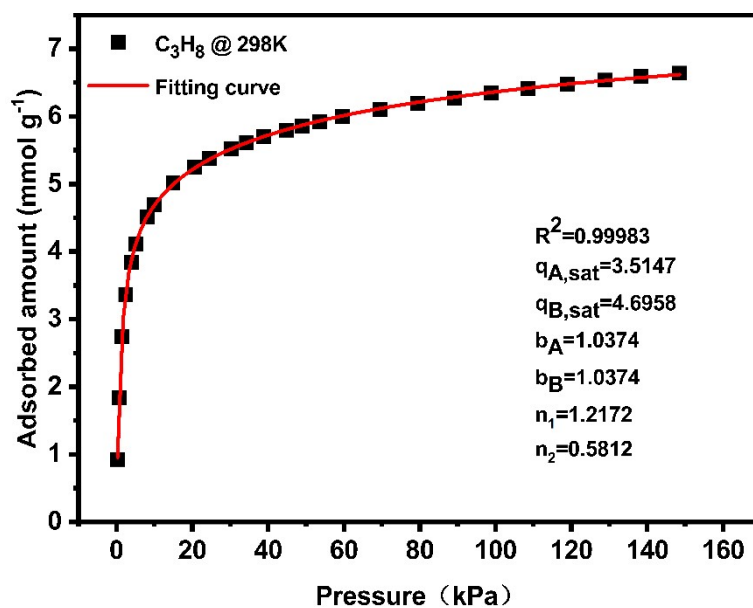

**Figure S8** Dual-site Langmuir-Freundlich model for  $C_3H_8$  adsorption isotherm on GNU-1 at 298 K.

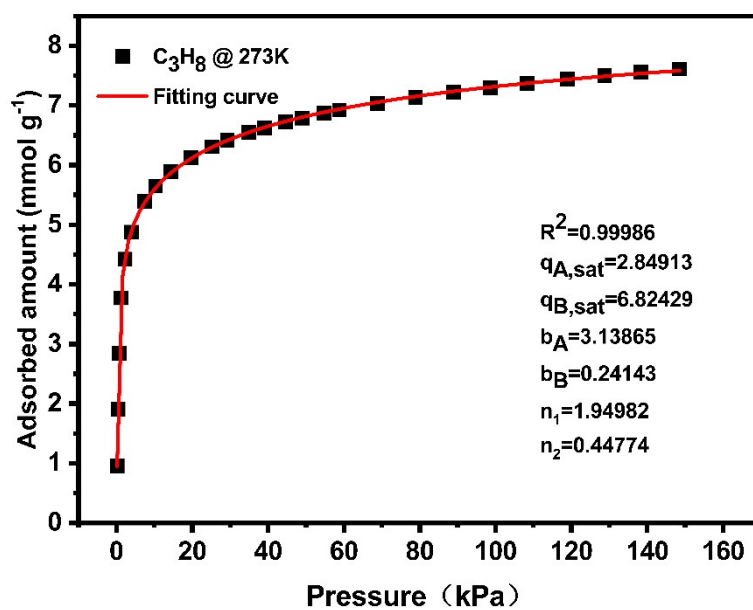

**Figure S9** Dual-site Langmuir-Freundlich model for  $C_3H_8$  adsorption isotherm on GNU-1 at 273 K.

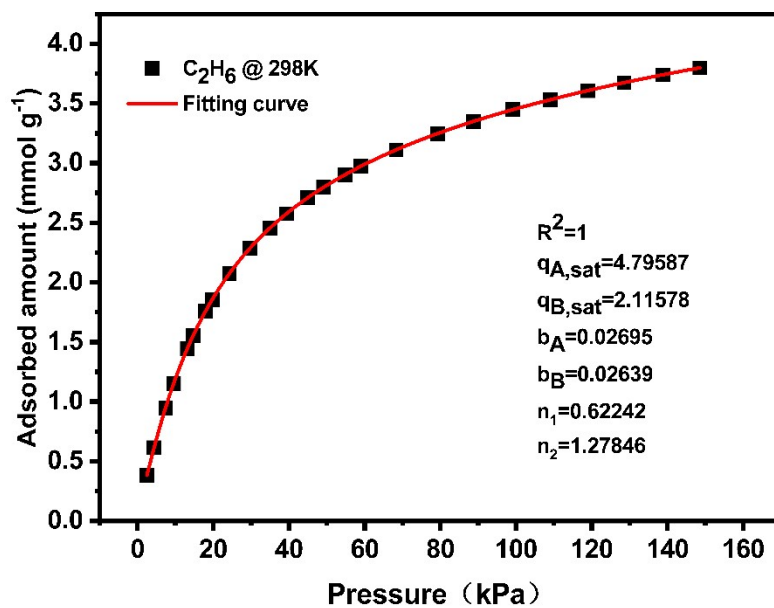

**Figure S10** Dual-site Langmuir-Freundlich model for  $C_2H_6$  adsorption isotherm on GNU-1 at 298 K.

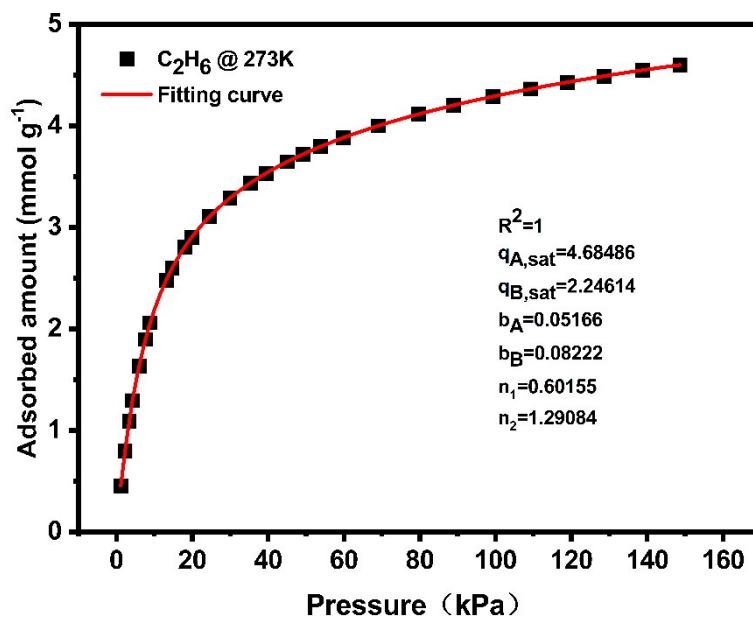

**Figure S11** Dual-site Langmuir-Freundlich model for  $C_2H_6$  adsorption isotherm on GNU-1 at 273 K.

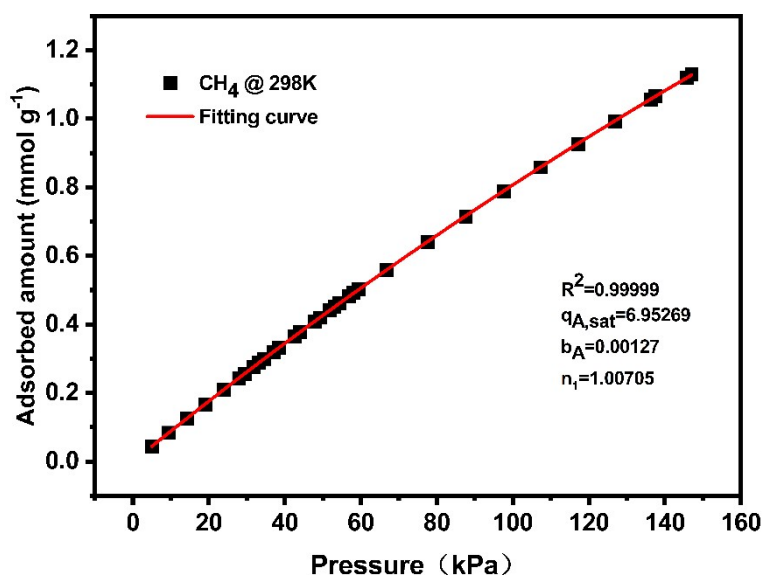

**Figure S12** Single-site Langmuir-Freundlich model for CH<sub>4</sub> adsorption isotherm on GNU-1 at 298 K.

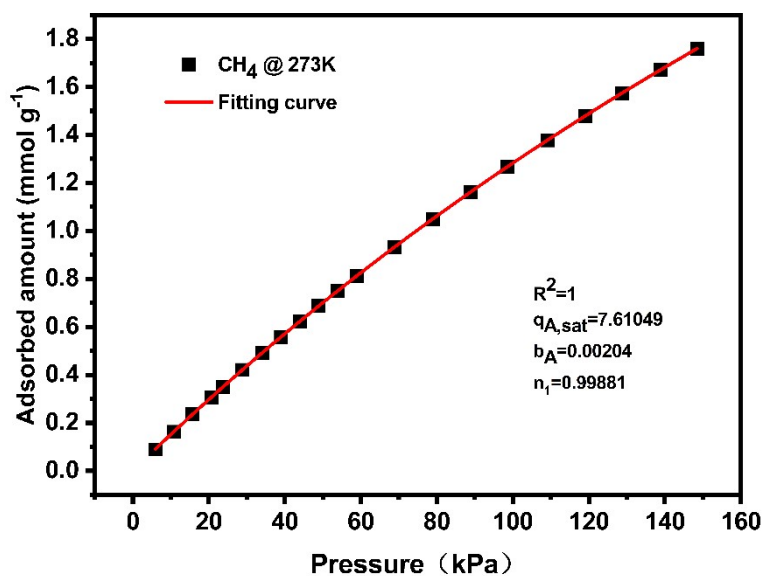

**Figure S13** Single-site Langmuir-Freundlich model for CH<sub>4</sub> adsorption isotherm on GNU-1 at 273 K.

## References

1. N. Metropolis, A. W. Rosenbluth, M. N. Rosenbluth, A. H. Teller and E. Teller, Equation of State Calculations by Fast Computing Machines, *The Journal of Chemical Physics*, 1953, **21**, 1087-1092.
2. Y. Wu, Z. Liu, J. Peng, X. Wang, X. Zhou and Z. Li, Enhancing Selective Adsorption in a Robust Pillared-Layer Metal–Organic Framework via Channel Methylation for the Recovery of C2–C3 from Natural Gas, *ACS Appl. Mater. Interfaces*, 2020, **12**, 51499-51505.
3. H. R. Fu, F. Wang and J. Zhang, A stable zinc-4-carboxypyrazole framework with high uptake and selectivity of light hydrocarbons, *Dalton Trans*, 2015, **44**, 2893-2896.
4. S.-M. Wang and Q.-Y. Yang, A copper-based metal-organic framework for upgrading natural gas

- through the recovery of C<sub>2</sub>H<sub>6</sub> and C<sub>3</sub>H<sub>8</sub>, *Green Chemical Engineering*, 2022, **4**(1): 81-87.
5. E. D. Bloch, R. Krishna and J. R. Long, Hydrocarbon Separations in a Metal-Organic Framework with Open Iron(II) Coordination Sites, *science*, 2012, **335**(6076): 1606-1610.
  6. S. Meng, H. Ma, L. Jiang, H. Ren and G. Zhu, A facile approach to prepare porphyrinic porous aromatic frameworks for small hydrocarbon separation, *J. Mater. Chem. A*, 2014, **2**, 14536-14541.
  7. J. Jia, L. Wang, F. Sun, X. Jing, Z. Bian, L. Gao, R. Krishna and G. Zhu, The adsorption and simulated separation of light hydrocarbons in isoreticular metal-organic frameworks based on dendritic ligands with different aliphatic side chains, *Chemistry*, 2014, **20**, 9073-9080.
  8. B. Yuan, X. Wang, X. Zhou, J. Xiao and Z. Li, Novel room-temperature synthesis of MIL-100(Fe) and its excellent adsorption performances for separation of light hydrocarbons, *Chemical Engineering Journal*, 2019, **355**, 679-686.
  9. Y. Wu, Y. Sun, J. Xiao, X. Wang and Z. Li, Glycine-Modified HKUST-1 with Simultaneously Enhanced Moisture Stability and Improved Adsorption for Light Hydrocarbons Separation, *ACS Sustainable Chemistry & Engineering*, 2018, **7**, 1557-1563.
  10. Y. Yuan, H. Wu, Y. Xu, D. Lv, S. Tu, Y. Wu, Z. Li and Q. Xia, Selective extraction of methane from C1/C2/C3 on moisture-resistant MIL-142A with interpenetrated networks, *Chemical Engineering Journal*, 2020, **395**.125057.
  11. Y. Zhang, L. Yang, L. Wang, S. Duttwyler and H. Xing, A Microporous Metal-Organic Framework Supramolecularly Assembled from a Cu(II) Dodecaborate Cluster Complex for Selective Gas Separation, *Angew Chem Int Ed Engl*, 2019, **58**, 8145-8150.
  12. R. Shi, D. Lv, Y. Chen, H. Wu, B. Liu, Q. Xia and Z. Li, Highly selective adsorption separation of light hydrocarbons with a porphyrinic zirconium metal-organic framework PCN-224, *Separation and Purification Technology*, 2018, **207**, 262-268.
  13. S. Gao, C. G. Morris, Z. Lu, Y. Yan, H. G. Godfrey, C. Murray, C. C. Tang, K. M. Thomas, S. Yang and M. Schroder, Selective hysteretic sorption of light hydrocarbons in a flexible metal-organic framework material, *Chemistry of Materials*, 2016, **28**, 2331-2340.
  14. Y. Huang, Z. Lin, H. Fu, F. Wang, M. Shen, X. Wang and R. Cao, Porous anionic indium-organic framework with enhanced gas and vapor adsorption and separation ability, *ChemSusChem*, 2014, **7**, 2647-2653.
  15. Y. He, Z. Zhang, S. Xiang, F. R. Fronczek, R. Krishna and B. Chen, A robust doubly interpenetrated metal-organic framework constructed from a novel aromatic tricarboxylate for highly selective separation of small hydrocarbons, *Chem. Commun.*, 2012, **48**, 6493-6495.
  16. G. Han, K. Wang, Y. Peng, Y. Zhang, H. Huang and C. Zhong, Enhancing Higher Hydrocarbons Capture for Natural Gas Upgrading by Tuning van der Waals Interactions in fcu-Type Zr-MOFs, *Industrial & Engineering Chemistry Research*, 2017, **56**, 14633-14641.
  17. Y.-P. He, Y.-X. Tan and J. Zhang, Tuning a layer to a pillared-layer metal-organic framework for adsorption and separation of light hydrocarbons, *Chem. Commun.*, 2013, **49**, 11323-11325.
  18. W. Liang, H. Xiao, D. Lv, J. Xiao and Z. Li, Novel asphalt-based carbon adsorbents with super-high adsorption capacity and excellent selectivity for separation for light hydrocarbons, *Sep. Purif. Technol.*, 2018, **190**, 60-67.
  19. J. Gu, X. Sun, L. Kan, J. Qiao, G. Li and Y. Liu, Structural Regulation and Light Hydrocarbon Adsorption/Separation of Three Zirconium-Organic Frameworks Based on Different V-Shaped Ligands, *ACS Appl. Mater. Interfaces*, 2021, **13**, 41680-41687.
  20. W. Fan, Y. Wang, Q. Zhang, A. Kirchon, Z. Xiao, L. Zhang, F. Dai, R. Wang and D. Sun, An Amino-Functionalized Metal-Organic Framework, Based on a Rare Ba<sub>12</sub>(COO)<sub>18</sub>(NO<sub>3</sub>)<sub>2</sub> Cluster, for Efficient C3/C2/C1 Separation and Preferential Catalytic Performance, *Chem-Eur J*, 2018, **24**, 2137-2143.
  21. P. Huang, C. Chen, M. Wu, F. Jiang and M. Hong, An indium-organic framework for the efficient storage of light hydrocarbons and selective removal of organic dyes, *Dalton Transactions*, 2019, **48**, 5527-5533.
  22. W. Fan, X. Wang, B. Xu, Y. Wang, D. Liu, M. Zhang, Y. Shang, F. Dai, L. Zhang and D. Sun, Amino-functionalized MOFs with high physicochemical stability for efficient gas storage/separation, dye adsorption and catalytic performance, *Journal of Materials Chemistry A*, 2018, **6**, 24486-24495.
  23. C. X. Chen, S. P. Zheng, Z. W. Wei, C. C. Cao, H. P. Wang, D. Wang, J. J. Jiang, D. Fenske and C. Y. Su, A robust metal-organic framework combining open metal sites and polar groups for methane purification and CO<sub>2</sub>/fluorocarbon capture, *Chem-Eur J*, 2017, **23**, 4060-4064.
